# Supplementary material for: Serum Irisin Levels, Endothelial Dysfunction, and Inflammation in Pediatric Patients with Type 2 Diabetes Mellitus and Metabolic Syndrome
Source: J Diabetes Res. 2020 Sep 4;2020:1949415. doi: 10.1155/2020/1949415 (PMC7492943; doi:10.1155/2020/1949415)
Supplement: Supplementary Materials — A complete correlation analysis for type 2 diabetes mellitus, metabolic syndrome, and healthy controls groups is attached as Supplementary Tables. Spearman's rho correlation coefficients for all variables included in this study are presented. There is an individual table with correlations for each of the study groups. ∗p < 0.05; ∗∗p < 0.01; ∗∗∗p < 0.001. [file 1949415.f1.zip]

Archive with 7 entries (6 files):
- Supplementary Tables/
- Supplementary Tables/Spearman's Correlation Analysis - T2DM patients.xlsx
- __MACOSX/Supplementary Tables/._Spearman's Correlation Analysis - T2DM patients.xlsx
- Supplementary Tables/Spearman's Correlation Analysis - MetS patients.xlsx
- __MACOSX/Supplementary Tables/._Spearman's Correlation Analysis - MetS patients.xlsx
- Supplementary Tables/Spearman's Correlation Analysis - Healthy Controls.xlsx
- __MACOSX/Supplementary Tables/._Spearman's Correlation Analysis - Healthy Controls.xlsx
