# Supplementary material for: Serum Irisin Levels, Endothelial Dysfunction, and Inflammation in Pediatric Patients with Type 2 Diabetes Mellitus and Metabolic Syndrome
Source: J Diabetes Res. 2020 Sep 4;2020:1949415. doi: 10.1155/2020/1949415 (PMC7492943; doi:10.1155/2020/1949415)
Supplement: Supplementary Materials — A complete correlation analysis for type 2 diabetes mellitus, metabolic syndrome, and healthy controls groups is attached as Supplementary Tables. Spearman's rho correlation coefficients for all variables included in this study are presented. There is an individual table with correlations for each of the study groups. ∗p < 0.05; ∗∗p < 0.01; ∗∗∗p < 0.001. [file 1949415.f1.zip › Supplementary Tables/Spearman's Correlation Analysis - Healthy Controls.xlsx]

## Sheet: Healthy Controls
Complete Correlation Analysis Table for Healthy Controls
	Age	Weight	Height	BMI	BMIp	WC	WCp	WC:Height	Hip circumference	WC:Hip circumference	SBPp	DBPp	Glucose	Insulin	HOMA	TC	HDL-c	LDL-c	TG	Irisin	sICAM-1	sPSGL-1	sE-selectin	sP-selectin	sEpCAM	sICAM-2	sALCAM	sPECAM-1	sCD44	sVCAM-1	sICAM-3	sL-selectin	sNCAM	IL-1β	IFN-α2	IFN-γ	TNF-α	MCP-1	IL-6	IL-8	IL-10	IL-12p70	IL-17A	IL-18	IL-23	IL-33
Age
Weight	0.914***
Height	0.922***	0.957***
BMI	0.663**	0.812***	0.626**
BMIp	-0.061	0.225	0.015	0.655**
WC	0.892***	0.865***	0.901***	0.547*	-0.11
WCp	-0.429	-0.282	-0.241	-0.321	0.085	-0.044
WC:Height	-0.347	-0.494	-0.506*	-0.347	-0.197	-0.156	0.303
Hip circumference	0.907***	0.879***	0.883***	0.609*	-0.047	0.985***	-0.081	-0.159
WC:Hip circumference	-0.391	-0.312	-0.292	-0.27	-0.006	-0.393	-0.084	0.07	-0.491
SBPp	-0.688**	-0.725**	-0.709**	-0.607*	-0.262	-0.525*	0.365	0.586*	-0.561*	0.326
DBPp	-0.592*	-0.623**	-0.519*	-0.612*	-0.085	-0.394	0.6*	0.358	-0.43	0.138	0.595*
Glucose	0.024	-0.052	0.064	-0.165	-0.092	-0.001	-0.025	-0.016	-0.043	0.109	-0.16	0.114
Insulin	-0.292	-0.341	-0.476	-0.094	0.04	-0.241	0.155	0.379	-0.138	-0.146	0.328	0.189	-0.16
HOMA	-0.458	-0.55*	-0.629**	-0.315	-0.066	-0.438	0.119	0.429	-0.356	-0.038	0.456	0.329	0.137	0.906***
TC	-0.187	-0.094	-0.097	-0.003	0.203	-0.077	0.38	-0.18	-0.053	-0.409	0.18	0.468	-0.137	0.181	0.132
HDL-c	-0.291	-0.256	-0.244	-0.218	0.071	-0.249	0.263	0.111	-0.192	-0.189	0.281	0.468	0.139	0.43	0.523*	0.458
LDL-c	-0.413	-0.292	-0.295	-0.195	0.015	-0.205	0.354	0.153	-0.228	-0.035	0.459	0.321	-0.488	0.102	0.021	0.666**	0.185
TG	-0.413	-0.408	-0.425	-0.213	0.113	-0.475	-0.154	-0.003	-0.483	0.274	-0.077	0.143	0.189	0.022	0.121	0.094	-0.23	0.153
Irisin	-0.238	-0.224	-0.33	0.024	0.312	-0.115	0.577*	0.462	-0.068	-0.155	0.372	0.377	-0.129	0.479	0.4	0.171	0.192	0.013	-0.302
sICAM-1	-0.064	-0.241	-0.218	-0.271	-0.371	0.05	0.134	0.724**	0.065	-0.07	0.453	0.171	-0.297	0.318	0.321	-0.263	0.128	0.124	-0.414	0.388
sPSGL-1	-0.153	-0.275	-0.199	-0.313	-0.31	-0.049	0.18	0.571*	-0.069	-0.009	0.425	0.181	-0.133	0.082	0.177	-0.163	0.241	0.232	-0.451	0.265	0.871***
sE-selectin	-0.058	-0.235	-0.209	-0.282	-0.409	0.047	0.096	0.688**	0.065	-0.092	0.444	0.134	-0.343	0.315	0.309	-0.241	0.134	0.174	-0.402	0.324	0.994***	0.868***
sP-selectin	0.01	-0.021	0.041	-0.003	0.13	-0.044	0.138	-0.068	-0.015	-0.409	-0.059	0.113	0.386	-0.059	0.109	0.157	0.447	-0.168	-0.446	0.235	0.112	0.414	0.085
sEpCAM	-0.194	-0.354	-0.292	-0.386	-0.349	-0.109	0.291	0.606*	-0.1	-0.219	0.47	0.273	-0.091	0.177	0.299	-0.055	0.346	0.137	-0.439	0.447	0.836***	0.881***	0.828***	0.42
sICAM-2	-0.134	-0.276	-0.243	-0.318	-0.39	-0.044	0.021	0.647**	-0.035	0.039	0.409	0.065	-0.266	0.265	0.303	-0.324	0.139	0.195	-0.294	0.168	0.947***	0.89***	0.962***	0.088	0.775***
sALCAM	-0.115	-0.253	-0.221	-0.294	-0.365	-0.021	0.041	0.644**	-0.012	0.039	0.406	0.093	-0.275	0.268	0.297	-0.296	0.159	0.202	-0.315	0.203	0.956***	0.896***	0.968***	0.091	0.783***	0.997***
sPECAM-1	-0.009	-0.071	0.006	-0.076	0.037	-0.021	0.22	0.006	0.006	-0.506*	-0.027	0.15	0.403	-0.044	0.132	0.19	0.391	-0.143	-0.405	0.262	0.138	0.409	0.112	0.976***	0.469	0.091	0.088
sCD44	-0.134	-0.276	-0.243	-0.318	-0.39	-0.044	0.021	0.647**	-0.035	0.039	0.409	0.065	-0.266	0.265	0.303	-0.324	0.139	0.195	-0.294	0.168	0.947***	0.89***	0.962***	0.088	0.775***	1***	0.997***	0.091
sVCAM-1	-0.133	-0.285	-0.237	-0.356	-0.443	-0.082	-0.072	0.6*	-0.088	0.158	0.406	0.018	-0.248	0.159	0.224	-0.458	0.062	0.1	-0.291	0.071	0.912***	0.864***	0.926***	0.047	0.732**	0.979***	0.971***	0.038	0.979***
sICAM-3	-0.1	-0.232	-0.217	-0.25	-0.334	-0.003	0.031	0.647**	0.018	-0.021	0.41	0.074	-0.275	0.326	0.344	-0.234	0.178	0.242	-0.311	0.224	0.947***	0.874***	0.962***	0.103	0.762***	0.988***	0.991***	0.103	0.988***	0.944***
sL-selectin	-0.05	-0.182	-0.149	-0.235	-0.343	0.1	0.257	0.553*	0.115	-0.243	0.412	0.133	-0.239	0.306	0.315	-0.038	0.116	0.268	-0.45	0.438	0.9***	0.862***	0.903***	0.288	0.834***	0.859***	0.868***	0.338	0.859***	0.779***	0.888***
sNCAM	-0.072	-0.185	-0.164	-0.197	-0.243	-0.15	-0.362	0.4	-0.141	0.299	0.109	-0.172	-0.048	0.068	0.174	-0.627**	0.006	-0.115	-0.047	-0.165	0.665**	0.655**	0.679**	0.035	0.448	0.824***	0.809***	-0.029	0.824***	0.874***	0.782***	0.494
IL-1β	0.145	-0.042	-0.004	-0.042	-0.205	-0.179	-0.676**	-0.218	-0.125	-0.297	-0.178	-0.221	-0.06	-0.227	-0.093	-0.139	-0.019	-0.209	0.045	-0.454	0.036	0.069	0.078	0.266	0.094	0.099	0.069	0.257	0.099	0.173	0.06	-0.039	0.296
IFN-α2	0.414	0.36	0.496	0.095	-0.22	0.242	-0.428	-0.644**	0.211	-0.252	-0.378	-0.261	0.368	-0.561*	-0.425	0.154	-0.019	-0.149	-0.102	-0.651**	-0.485	-0.24	-0.449	0.37	-0.288	-0.409	-0.427	0.358	-0.409	-0.352	-0.418	-0.336	-0.236	0.53*
IFN-γ	0.24	0.055	0.053	0.079	-0.122	-0.04	-0.511*	-0.141	0.024	-0.192	0.039	-0.028	-0.311	0.129	0.108	0.021	0.223	-0.108	-0.391	0.016	0.326	0.296	0.347	0.313	0.249	0.279	0.295	0.222	0.279	0.304	0.299	0.256	0.281	0.642**	0.23
TNF-α	-0.036	-0.077	-0.094	-0.006	-0.002	-0.166	-0.101	-0.029	-0.093	-0.369	0.148	-0.021	-0.375	0.178	0.184	0.196	0.489	0.23	-0.5*	0.168	0.465	0.613*	0.502*	0.576*	0.606*	0.495	0.504*	0.511*	0.495	0.455	0.515*	0.545*	0.342	0.454	0.089	0.709**
MCP-1	0.078	-0.1	-0.028	-0.218	-0.367	-0.056	-0.28	0.062	-0.029	-0.152	-0.223	-0.187	0.299	0.047	0.209	-0.44	0.239	-0.506*	-0.072	-0.329	0.15	0.202	0.159	0.282	0.282	0.215	0.179	0.303	0.215	0.279	0.124	-0.009	0.374	0.49	0.208	0.148	0.197
IL-6	0.092	-0.05	-0.006	-0.25	-0.498*	0.012	-0.288	0.206	0.009	0.302	0.155	-0.143	-0.317	0.153	0.103	-0.477	0.144	-0.102	-0.3	-0.138	0.556*	0.446	0.591*	-0.256	0.38	0.624**	0.626**	-0.329	0.624**	0.694**	0.574*	0.321	0.65**	0.125	-0.238	0.403	0.328	0.359
IL-8	-0.352	-0.253	-0.329	0	0.415	-0.532*	0.078	-0.362	-0.485	-0.047	0.046	0.14	-0.085	-0.003	0.079	0.122	0.143	-0.19	-0.053	0.282	-0.276	-0.156	-0.3	0.409	-0.001	-0.338	-0.341	0.374	-0.338	-0.297	-0.371	-0.224	-0.271	0.296	0.064	0.265	0.337	0.094	-0.285
IL-10	0.024	-0.15	-0.18	-0.227	-0.42	-0.071	-0.236	0.295	-0.006	0.003	0.21	-0.061	-0.388	0.455	0.405	-0.321	0.142	-0.107	-0.164	0.13	0.638**	0.346	0.67**	-0.286	0.466	0.632**	0.636**	-0.295	0.632**	0.644**	0.623**	0.468	0.554*	0.199	-0.415	0.432	0.366	0.275	0.807***	-0.147
IL-12p70	0.471	0.43	0.422	0.377	0.038	0.213	-0.585*	-0.461	0.28	-0.373	-0.307	-0.366	-0.193	-0.098	-0.144	0.167	0.262	0.022	-0.384	-0.326	0.013	0.13	0.067	0.39	0.014	0.086	0.095	0.282	0.086	0.082	0.133	0.083	0.179	0.609*	0.57*	0.764***	0.691**	0.11	0.206	0.079	0.138
IL-17A	0.336	0.266	0.307	0.093	-0.187	0.119	-0.475	-0.43	0.122	0.078	-0.001	-0.206	-0.183	-0.173	-0.209	-0.118	-0.076	-0.169	-0.468	-0.158	0.042	0.049	0.066	0.161	-0.09	0.042	0.051	0.054	0.042	0.119	0.06	0.072	0.134	0.391	0.433	0.737**	0.386	-0.161	0.313	0.149	0.2	0.668**
IL-18	0.092	-0.053	-0.152	0.053	-0.166	0.018	-0.129	0.206	0.097	-0.28	0.266	0.004	-0.731**	0.494	0.303	0.116	0.012	0.199	-0.259	0.362	0.544*	0.253	0.571*	-0.221	0.364	0.415	0.432	-0.203	0.415	0.371	0.453	0.488	0.124	0.203	-0.373	0.603*	0.477	-0.103	0.418	0.065	0.711**	0.258	0.284
IL-23	0.133	0.107	0.046	0.246	0.295	-0.077	-0.196	-0.059	-0.018	-0.13	0.031	-0.016	-0.32	-0.06	-0.116	-0.088	0.159	-0.195	-0.545*	0.358	0.281	0.306	0.262	0.459	0.283	0.182	0.208	0.347	0.182	0.212	0.197	0.205	0.191	0.393	0.009	0.759***	0.649**	-0.052	0.196	0.499*	0.184	0.541*	0.608*	0.384
IL-33	0.316	0.251	0.175	0.334	0.076	0.038	-0.631**	-0.254	0.121	-0.116	-0.157	-0.292	-0.414	0.169	0.098	-0.033	0.179	-0.012	-0.25	-0.151	0.272	0.232	0.314	0.107	0.114	0.328	0.346	-0.018	0.328	0.334	0.364	0.219	0.438	0.544*	0.127	0.842***	0.684**	0.112	0.465	0.115	0.51*	0.82***	0.595*	0.574*	0.574*
Spearman's rho correlation coefficients for all variables included in this study are presented.
* : p-value < 0.05
** : p-value < 0.01
*** : p-value < 0.001
