# Supplementary material for: Serum Irisin Levels, Endothelial Dysfunction, and Inflammation in Pediatric Patients with Type 2 Diabetes Mellitus and Metabolic Syndrome
Source: J Diabetes Res. 2020 Sep 4;2020:1949415. doi: 10.1155/2020/1949415 (PMC7492943; doi:10.1155/2020/1949415)
Supplement: Supplementary Materials — A complete correlation analysis for type 2 diabetes mellitus, metabolic syndrome, and healthy controls groups is attached as Supplementary Tables. Spearman's rho correlation coefficients for all variables included in this study are presented. There is an individual table with correlations for each of the study groups. ∗p < 0.05; ∗∗p < 0.01; ∗∗∗p < 0.001. [file 1949415.f1.zip › Supplementary Tables/Spearman's Correlation Analysis - MetS patients.xlsx]

## Sheet: Metabolic Syndrome
Complete Correlation Analysis Table for Metabolic Syndrome Patients
	Age	Weight	Height	BMI	BMIp	WC	WCp	WC:Height	Hip circumference	WC:Hip circumference	BF%	SBPp	DBPp	Glucose	Insulin	HOMA	TC	HDL-c	LDL-c	TG	Irisin	sICAM-1	sPSGL-1	sE-selectin	sP-selectin	sEpCAM	sICAM-2	sALCAM	sPECAM-1	sCD44	sVCAM-1	sICAM-3	sL-selectin	sNCAM	IL-1β	IFN-α2	IFN-γ	TNF-α	MCP-1	IL-6	IL-8	IL-10	IL-12p70	IL-17A	IL-18	IL-23	IL-33
Age
Weight	0.718***
Height	0.799***	0.88***
BMI	0.448	0.886***	0.635**
BMIp	0.061	0.631**	0.366	0.868***
WC	0.347	0.82***	0.691**	0.8***	0.737***
WCp	-0.207	0.454	0.225	0.652**	0.839***	0.78***
WC:Height	-0.166	0.43	0.203	0.623**	0.763***	0.799***	0.922***
Hip circumference	0.682**	0.936***	0.881***	0.853***	0.584**	0.791***	0.424	0.418
WC:Hip circumference	-0.415	-0.063	-0.131	0.068	0.374	0.385	0.594**	0.609**	-0.173
BF%	0.012	0.572*	0.231	0.809***	0.773***	0.701***	0.778***	0.816***	0.531*	0.292
SBPp	-0.145	-0.001	-0.041	0.113	-0.002	0.16	0.211	0.351	0.173	0.017	0.322
DBPp	0.207	0.306	0.183	0.452	0.305	0.239	0.281	0.31	0.455	-0.262	0.456*	0.61**
Glucose	0.431	0.286	0.354	0.136	-0.087	0.203	-0.019	0.004	0.351	-0.11	0.083	0.25	0.538*
Insulin	0.151	0.329	0.343	0.297	0.154	0.281	0.316	0.312	0.309	0.085	0.373	0.403	0.367	0.17
HOMA	0.247	0.46*	0.498*	0.414	0.3	0.355	0.396	0.239	0.448	0.075	0.328	0.318	0.441	0.372	0.833***
TC	0.285	0.223	0.309	0.212	0.162	0.18	0.175	0.223	0.282	-0.092	0.132	0.171	0.426	0.182	0.486*	0.378
HDL-c	0.162	0.342	0.253	0.382	0.26	0.371	0.249	0.429	0.478*	-0.099	0.314	0.612**	0.521*	0.182	0.26	0.173	0.272
LDL-c	0.274	0.078	0.204	0.051	0.018	0.06	-0.002	0.085	0.137	-0.153	0.008	0.055	0.232	0.125	0.241	0.119	0.898***	0.101
TG	0.036	0.233	0.172	0.265	0.235	0.29	0.347	0.396	0.212	0.188	0.349	0.115	0.173	0.154	0.442	0.281	0.566*	0.128	0.366
Irisin	-0.116	-0.096	-0.141	-0.045	-0.181	-0.171	-0.125	-0.068	-0.004	-0.168	0.014	0.545*	0.381	0.449	0.193	0.141	0.035	0.338	-0.122	0.244
sICAM-1	-0.256	0.019	-0.061	0.116	0.291	0.093	0.364	0.289	-0.151	0.452	0.244	-0.259	-0.214	-0.3	0.445	0.274	0.303	-0.266	0.137	0.568*	0.124
sPSGL-1	0.097	0.055	0.023	-0.013	0.021	-0.12	0.044	-0.075	-0.152	0.086	-0.05	-0.382	-0.058	-0.101	0.448	0.362	0.397	-0.25	0.2	0.293	-0.031	0.713***
sE-selectin	-0.295	0.06	-0.05	0.188	0.299	0.259	0.486*	0.437	-0.033	0.465*	0.409	0.11	0.076	0.005	0.462*	0.361	0.183	-0.098	-0.015	0.651**	0.381	0.782***	0.365
sP-selectin	0.195	0.326	0.063	0.356	0.19	0.31	0.16	0.193	0.248	0.041	0.402	0.109	0.04	0.151	-0.067	-0.007	-0.521*	0.209	-0.522*	-0.077	-0.025	-0.289	-0.294	-0.011
sEpCAM	-0.128	-0.004	0.047	-0.12	-0.023	0.17	0.255	0.226	-0.127	0.509*	-0.075	0.232	-0.155	-0.045	0.467*	0.443	-0.034	0.158	-0.179	-0.053	0.065	0.278	0.346	0.251	0.047
sICAM-2	-0.12	0.142	0.126	0.104	0.215	0.176	0.306	0.246	-0.008	0.421	0.082	-0.147	-0.17	-0.162	0.503*	0.391	0.238	-0.025	-0.053	0.619**	0.032	0.726***	0.575*	0.623**	-0.196	0.433
sALCAM	-0.256	-0.009	-0.081	0.056	0.225	0.046	0.353	0.261	-0.191	0.434	0.202	-0.203	-0.151	-0.216	0.537*	0.389	0.385	-0.237	0.188	0.614**	0.074	0.96***	0.785***	0.747***	-0.305	0.362	0.802***
sPECAM-1	0.291	0.2	0.076	0.104	-0.089	0.102	-0.071	0.009	0.104	0.029	0.058	0.091	0.069	0.169	0.247	0.149	-0.181	0.349	-0.366	0.125	0.085	-0.077	0.171	0.074	0.677**	0.345	0.265	0.002
sCD44	-0.205	0.093	-0.004	0.168	0.344	0.25	0.437	0.407	-0.068	0.563*	0.223	-0.093	-0.102	-0.308	0.434	0.267	0.196	-0.046	-0.072	0.525*	-0.037	0.779***	0.57*	0.739***	-0.114	0.459*	0.882***	0.789***	0.277
sVCAM-1	-0.336	-0.051	0.022	-0.037	0.175	0.027	0.277	0.16	-0.169	0.467*	0.058	-0.281	-0.368	-0.255	0.344	0.3	0.084	-0.388	-0.025	0.261	0.039	0.786***	0.506*	0.475*	-0.484*	0.315	0.605**	0.754***	-0.377	0.504*
sICAM-3	-0.218	0.102	0.085	0.081	0.194	0.159	0.337	0.253	-0.048	0.398	0.112	0.128	-0.114	-0.234	0.623**	0.544*	0.142	0.045	-0.083	0.27	0.205	0.672**	0.507*	0.604**	-0.225	0.724***	0.774***	0.721***	0.084	0.739***	0.642**
sL-selectin	-0.052	0.067	0.039	0.139	0.276	0.108	0.327	0.275	-0.001	0.224	0.244	-0.126	0.177	0.204	0.412	0.368	0.55*	-0.098	0.555*	0.263	0.075	0.558*	0.513*	0.332	-0.4	0.157	0.182	0.575**	-0.354	0.174	0.502*	0.3
sNCAM	-0.102	-0.009	0.074	-0.116	0.042	-0.01	0.057	0.026	-0.17	0.42	-0.212	-0.292	-0.347	-0.137	0.211	0.184	0.049	-0.122	-0.155	0.356	-0.101	0.504*	0.456*	0.318	-0.274	0.423	0.877***	0.589**	0.2	0.7***	0.577**	0.63**	0.046
IL-1β	0.171	0.042	-0.043	-0.033	-0.168	-0.224	-0.327	-0.263	-0.121	-0.056	-0.073	-0.098	-0.138	0.181	-0.052	-0.001	-0.119	0.065	-0.183	0.214	0.231	0.052	0.161	0.044	0.276	-0.021	0.268	0.142	0.436	0.062	-0.033	0.084	-0.206	0.406
IFN-α2	-0.085	-0.181	-0.081	-0.257	-0.13	-0.18	-0.256	-0.091	-0.274	0.2	-0.253	-0.233	-0.469*	-0.128	-0.285	-0.353	-0.251	-0.076	-0.074	-0.183	-0.139	-0.058	-0.158	-0.315	-0.137	0.081	0.037	-0.069	-0.165	-0.112	0.265	0.018	0.018	0.409	0.337
IFN-γ	0.069	0.082	0.001	-0.035	-0.171	-0.229	-0.243	-0.295	-0.092	-0.159	-0.014	-0.259	-0.256	0.07	0.079	0.082	-0.074	-0.212	-0.097	0.112	0.3	0.311	0.385	0.054	-0.063	-0.047	0.211	0.342	-0.053	-0.054	0.425	0.23	0.204	0.247	0.63**	0.258
TNF-α	0.07	0.072	0.049	-0.079	-0.198	-0.166	-0.218	-0.365	-0.059	-0.298	-0.077	-0.291	-0.252	0.047	-0.117	0.094	-0.445	-0.35	-0.408	-0.153	-0.27	-0.178	-0.002	-0.118	0.329	-0.145	-0.004	-0.086	0.138	-0.218	-0.013	-0.059	-0.349	0.093	0.482*	0.078	0.467*
MCP-1	-0.04	0.037	-0.025	0.074	0.053	0.034	-0.007	0.03	0.006	-0.188	0.189	-0.301	-0.366	-0.529*	-0.25	-0.382	-0.16	-0.18	0.027	-0.135	-0.514*	-0.014	-0.117	-0.182	0.158	-0.408	-0.333	-0.119	-0.2	-0.244	-0.023	-0.354	-0.191	-0.381	-0.12	0.039	0.068	0.316
IL-6	0.078	0.304	0.129	0.218	0.045	0.156	0.122	0.123	0.125	0.026	0.398	-0.041	-0.035	0.141	0.311	0.204	-0.055	-0.174	-0.119	0.192	0.176	0.33	0.332	0.193	0.068	0.028	0.212	0.351	-0.031	0.074	0.427	0.26	0.254	0.122	0.311	0.107	0.786***	0.365	0.14
IL-8	0.119	0.136	0.034	0.064	-0.136	-0.083	-0.275	-0.186	0.043	-0.235	0.136	-0.245	-0.396	-0.136	-0.178	-0.311	-0.366	-0.137	-0.234	-0.04	0.062	0.004	-0.11	-0.176	0.28	-0.358	-0.173	-0.088	-0.018	-0.321	0.126	-0.213	-0.161	-0.125	0.418	0.356	0.692**	0.443	0.574*	0.633**
IL-10	0.144	0.209	0.112	0.055	-0.137	0.051	-0.011	-0.07	0.066	-0.053	0.151	-0.053	-0.031	0.42	0.194	0.244	0.08	-0.112	0.015	0.373	0.445	0.303	0.334	0.354	0.124	0.029	0.197	0.356	0.1	0.003	0.22	0.19	0.249	0.072	0.526*	-0.137	0.784***	0.399	-0.067	0.708***	0.444
IL-12p70	0.05	-0.043	-0.09	-0.192	-0.251	-0.159	-0.271	-0.198	-0.209	0.134	-0.161	-0.098	-0.266	0.282	-0.193	-0.112	-0.319	-0.038	-0.299	0.018	0.08	-0.142	-0.03	-0.144	0.248	0.124	0.19	-0.022	0.315	-0.06	0.004	0.047	-0.203	0.456*	0.83***	0.572*	0.568*	0.487*	-0.243	0.383	0.375	0.457*
IL-17A	0.356	0.084	0.207	-0.1	-0.347	-0.136	-0.415	-0.267	0.122	-0.23	-0.179	0.123	0.024	0.286	0.006	-0.072	0.07	0.068	0.114	-0.125	0.15	-0.304	-0.073	-0.54*	-0.204	-0.113	-0.205	-0.274	-0.104	-0.425	0.028	-0.232	-0.044	0.007	0.22	0.418	0.432	-0.023	-0.084	0.439	0.439	0.173	0.39
IL-18	-0.112	0.253	0.097	0.365	0.306	0.144	0.212	0.147	0.198	0.062	0.433	-0.072	-0.126	-0.163	0.147	0.137	-0.142	-0.05	-0.236	0.2	0.357	0.47*	0.122	0.365	0.068	-0.177	0.161	0.34	-0.186	0.095	0.514*	0.232	0.14	-0.002	0.234	-0.037	0.637**	0.177	0.314	0.591**	0.653**	0.501*	0.021	0.081
IL-23	0.137	0.089	-0.004	-0.075	-0.225	-0.188	-0.349	-0.307	-0.049	-0.176	-0.166	-0.153	-0.219	0.13	-0.233	-0.207	-0.277	0.029	-0.309	-0.022	0.33	-0.06	0.072	-0.188	0.072	-0.05	0.147	-0.024	0.141	-0.106	0.076	0.081	-0.198	0.334	0.715***	0.417	0.791***	0.385	-0.143	0.568*	0.582**	0.568*	0.787***	0.53*	0.335
IL-33	-0.064	-0.125	-0.327	-0.114	-0.216	-0.344	-0.223	-0.195	-0.262	-0.098	0.016	0.177	0.169	0.216	0.016	0.025	-0.106	0.067	-0.215	0.033	0.451	0.026	0.284	-0.023	0.13	0.1	0.086	0.142	0.256	-0.026	-0.011	0.125	-0.005	0.165	0.693**	0.146	0.667**	0.277	-0.279	0.539*	0.29	0.554*	0.665**	0.393	0.2	0.732***
Spearman's rho correlation coefficients for all variables included in this study are presented.
* : p-value < 0.05
** : p-value < 0.01
*** : p-value < 0.001
