# Supplementary material for: Serum Irisin Levels, Endothelial Dysfunction, and Inflammation in Pediatric Patients with Type 2 Diabetes Mellitus and Metabolic Syndrome
Source: J Diabetes Res. 2020 Sep 4;2020:1949415. doi: 10.1155/2020/1949415 (PMC7492943; doi:10.1155/2020/1949415)
Supplement: Supplementary Materials — A complete correlation analysis for type 2 diabetes mellitus, metabolic syndrome, and healthy controls groups is attached as Supplementary Tables. Spearman's rho correlation coefficients for all variables included in this study are presented. There is an individual table with correlations for each of the study groups. ∗p < 0.05; ∗∗p < 0.01; ∗∗∗p < 0.001. [file 1949415.f1.zip › Supplementary Tables/Spearman's Correlation Analysis - T2DM patients.xlsx]

## Sheet: T2DM
Complete Correlation Analysis Table for Type 2 Diabetes Mellitus Patients
	Age	Weight	Height	BMI	BMIp	WC	WCp	WC:Height	Hip Circumference	WC:Hip circumference	BF%	SBPp	DBPp	Glucose	Insulin	HOMA	TC	HDL-c	LDL-c	TG	Irisin	sICAM-1	sPSGL-1	sE-selectin	sP-selectin	sEpCAM	sICAM-2	sALCAM	sPECAM-1	sCD44	sVCAM-1	sICAM-3	sL-selectin	sNCAM	IL-1β	IFN-α2	IFN-γ	TNF-α	MCP-1	IL-6	IL-8	IL-10	IL-12p70	IL-17A	IL-18	IL-23	IL-33
Age
Weight	0.198
Height	0.241	0.602**
BMI	0.116	0.883***	0.219
BMIp	-0.136	0.847***	0.188	0.939***
WC	0.122	0.901***	0.455*	0.837***	0.836***
WCp	-0.071	0.831***	0.425	0.779***	0.841***	0.942***
WC:Height	-0.031	0.752***	0.135	0.84***	0.877***	0.915***	0.879***
Hip circumference	0.198	0.85***	0.434*	0.86***	0.782***	0.859***	0.77***	0.807***
WC:Hip circumference	-0.101	0.094	0.04	0.005	0.087	0.378	0.387	0.328	-0.062
BF%	-0.09	0.668***	0.189	0.773***	0.699***	0.754***	0.735***	0.753***	0.789***	0.141
SBPp	-0.394	-0.146	-0.205	-0.005	0.063	0.035	0.069	0.163	-0.152	0.51*	0.062
DBPp	-0.061	-0.296	-0.392	-0.101	-0.131	-0.194	-0.286	-0.061	-0.322	0.333	-0.183	0.689***
Glucose	-0.064	-0.316	-0.393	-0.229	-0.243	-0.283	-0.329	-0.225	-0.222	-0.106	-0.045	-0.189	0.053
Insulin	0.332	0.503*	0.335	0.449*	0.409	0.574**	0.544*	0.461*	0.439*	0.222	0.293	0.017	-0.086	0.021
HOMA	0.21	0.325	0.251	0.265	0.244	0.323	0.316	0.244	0.288	-0.051	0.194	-0.2	-0.158	0.448*	0.818***
TC	0.276	0.014	-0.191	0.128	0.027	0.099	0.032	0.08	0.003	0.328	0.12	0.064	0.256	0.212	0.517*	0.301
HDL-c	0.071	-0.17	0.024	-0.262	-0.233	-0.219	-0.223	-0.217	-0.285	0.129	-0.428	0.008	0.236	-0.145	0.036	0.026	0.259
LDL-c	0.243	-0.02	-0.351	0.235	0.129	0.016	-0.06	0.114	0.088	-0.002	0.04	0.139	0.405	0.207	0.343	0.198	0.74***	0.053
TG	0.244	0.088	0.303	-0.087	-0.117	0.074	0.043	-0.16	-0.123	0.332	-0.169	0.049	-0.016	-0.243	0.345	-0.001	0.365	0.051	0.001
Irisin	-0.096	0.021	-0.236	0.09	0.076	0.043	-0.003	0.042	-0.095	0.252	0.044	0.224	0.418	0.268	0.263	0.202	0.598**	0.35	0.55*	0.04
sICAM-1	-0.165	0.321	0.308	0.136	0.292	0.346	0.474*	0.332	0.142	0.076	0.157	-0.248	-0.4	-0.144	0.094	0.229	-0.498*	-0.194	-0.553**	-0.196	-0.292
sPSGL-1	-0.254	0.012	0.182	-0.078	0.09	0.062	0.204	0.121	-0.095	0.093	-0.145	0.034	-0.075	-0.051	0.049	0.174	-0.333	-0.16	-0.199	-0.16	-0.233	0.644**
sE-selectin	-0.213	0.255	0.226	0.094	0.274	0.293	0.421	0.281	0.09	0.076	0.096	-0.215	-0.331	0.13	0.227	0.458*	-0.366	-0.062	-0.391	-0.274	-0.083	0.864***	0.631**
sP-selectin	-0.054	0.034	0.092	-0.106	-0.009	0.011	0.044	-0.035	-0.055	0.176	-0.146	-0.088	-0.212	0.171	-0.019	0.057	0.115	0.349	0.116	-0.245	0.241	-0.039	0.013	0.245
sEpCAM	-0.622**	-0.043	0.163	-0.199	0.071	-0.014	0.151	0.027	-0.186	0.148	-0.192	0.068	-0.263	-0.129	-0.201	-0.115	-0.431	0.022	-0.387	-0.167	-0.195	0.495*	0.691***	0.542*	0.366
sICAM-2	-0.223	0.129	0.355	-0.094	0.096	0.158	0.345	0.118	-0.025	0.092	-0.089	-0.169	-0.354	-0.112	0.114	0.309	-0.507*	0.14	-0.598**	-0.17	-0.302	0.844***	0.648**	0.866***	0.158	0.582**
sALCAM	-0.182	0.238	0.281	0.055	0.225	0.256	0.409	0.236	0.046	0.061	0.042	-0.186	-0.314	-0.155	0.143	0.269	-0.444*	-0.009	-0.524*	-0.097	-0.194	0.935***	0.592**	0.877***	0.004	0.436*	0.895***
sPECAM-1	-0.108	-0.153	-0.008	-0.227	-0.119	-0.112	-0.059	-0.065	-0.128	0.155	-0.147	0.001	-0.141	0.13	-0.23	-0.139	0.018	0.2	0.086	-0.381	-0.012	-0.018	0.209	0.197	0.873***	0.45*	0.139	-0.038
sCD44	-0.243	0.184	0.27	0.025	0.208	0.202	0.396	0.21	0.008	0.051	0.01	-0.12	-0.313	-0.137	0.157	0.308	-0.431	0.051	-0.477*	-0.155	-0.206	0.896***	0.674***	0.881***	0.087	0.528*	0.938***	0.969***	0.073
sVCAM-1	-0.247	0.101	0.223	-0.04	0.139	0.147	0.347	0.175	-0.082	0.165	-0.055	0.031	-0.171	-0.108	0.153	0.288	-0.376	0.114	-0.411	-0.103	-0.179	0.81***	0.71***	0.817***	0.096	0.533*	0.909***	0.899***	0.113	0.966***
sICAM-3	-0.302	0.061	0.27	-0.152	0.063	0.099	0.301	0.079	-0.108	0.122	-0.118	-0.118	-0.373	-0.088	0.027	0.208	-0.529*	0.106	-0.602**	-0.15	-0.305	0.823***	0.605**	0.865***	0.243	0.653**	0.968***	0.879***	0.226	0.929***	0.916***
sL-selectin	-0.354	0.21	0.041	0.255	0.39	0.315	0.479*	0.358	0.036	0.349	0.186	0.275	0.064	-0.072	0.248	0.222	-0.145	-0.314	-0.133	0.089	-0.116	0.504*	0.688***	0.473*	-0.281	0.463*	0.464*	0.429	-0.204	0.495*	0.562**	0.445*
sNCAM	-0.226	0.073	0.322	-0.11	0.08	0.104	0.296	0.118	-0.071	0.103	-0.184	0.004	-0.253	-0.293	0.079	0.151	-0.487*	0.204	-0.479*	-0.061	-0.367	0.732***	0.694***	0.71***	0.131	0.642**	0.905***	0.81***	0.169	0.899***	0.935***	0.917***	0.486*
IL-1β	-0.008	0.191	0.501*	-0.109	-0.097	0.097	0.001	-0.081	0.062	0.134	-0.16	0.014	-0.056	-0.441*	-0.205	-0.383	-0.199	0.162	-0.217	0.236	0.117	0.007	-0.051	-0.182	0.14	0.195	-0.067	-0.022	0.029	-0.107	-0.144	-0.071	-0.315	-0.006
IFN-α2	0.222	-0.165	0.165	-0.276	-0.252	-0.178	-0.201	-0.17	-0.022	-0.255	-0.412	-0.287	-0.103	-0.437*	-0.352	-0.389	-0.393	0.14	-0.167	-0.163	-0.376	0.138	0.237	-0.035	-0.027	0.12	0.171	0.126	0.145	0.079	0.016	0.09	-0.281	0.209	0.427
IFN-γ	-0.17	0.345	0.247	0.196	0.262	0.165	0.161	0.126	0.135	-0.148	-0.016	-0.127	-0.188	-0.123	-0.01	0.003	-0.246	-0.075	-0.153	0.149	0.113	0.348	0.178	0.129	-0.114	0.195	0.134	0.338	-0.304	0.277	0.234	0.144	0.083	0.21	0.549**	0.039
TNF-α	-0.072	-0.027	0.23	-0.195	-0.179	-0.127	-0.093	-0.153	-0.078	-0.118	-0.19	-0.142	-0.185	-0.391	-0.3	-0.344	-0.248	0.157	-0.231	0.022	-0.074	0.212	0.021	-0.158	-0.106	0.109	0.092	0.177	-0.132	0.137	0.098	0.078	-0.246	0.186	0.682***	0.455*	0.664**
MCP-1	-0.074	0.139	0.029	0.125	0.09	0.138	0.046	0.045	0.126	0.196	0.286	0.027	0.108	0.003	-0.112	-0.171	0.259	0.071	0.091	-0.129	0.298	-0.312	-0.582**	-0.287	0.213	-0.206	-0.388	-0.414	0.126	-0.496*	-0.582**	-0.397	-0.377	-0.596**	0.208	-0.129	-0.281	-0.05
IL-6	-0.015	0.406	0.609**	0.206	0.211	0.305	0.366	0.169	0.338	-0.179	0.234	-0.129	-0.316	-0.197	0.381	0.421	-0.146	0.016	-0.215	0.057	0.027	0.451*	0.308	0.401	-0.005	0.105	0.453*	0.568**	-0.142	0.568**	0.488*	0.365	0.043	0.43	0.265	0.055	0.468*	0.333	-0.322
IL-8	-0.278	-0.031	0.101	-0.175	-0.187	-0.113	-0.072	-0.197	-0.138	0.083	0.054	-0.02	-0.255	0.189	-0.119	-0.008	0.049	0.051	-0.144	-0.064	0.421	-0.027	-0.149	-0.075	0.275	0.166	-0.073	-0.118	0.109	-0.099	-0.114	-0.034	-0.162	-0.162	0.421	-0.281	0.374	0.447*	0.291	0.144
IL-10	-0.102	0.164	0.303	-0.018	-0.002	0.006	0.016	-0.086	-0.035	-0.154	-0.038	0.001	-0.061	-0.323	-0.062	-0.088	-0.293	-0.01	-0.372	0.19	0.117	0.366	0.055	0.118	-0.301	-0.021	0.183	0.444*	-0.431	0.329	0.242	0.153	-0.095	0.171	0.554**	0.155	0.722***	0.65**	-0.134	0.629**	0.312
IL-12p70	0.264	0.016	0.323	-0.222	-0.211	-0.131	-0.195	-0.222	-0.079	-0.141	-0.467*	-0.237	-0.131	-0.234	-0.302	-0.287	-0.436*	0.035	-0.309	0.161	-0.318	0.167	0.275	-0.055	-0.036	0.121	0.145	0.141	-0.006	0.089	0.095	0.099	-0.13	0.22	0.601**	0.654**	0.533*	0.561**	-0.36	0.149	0.023	0.407
IL-17A	0.035	0.1	0.489*	-0.229	-0.203	0.094	0.028	-0.1	0.063	0.064	-0.159	-0.275	-0.428	-0.149	-0.073	-0.072	-0.332	0.002	-0.399	0.011	-0.093	0.212	0.12	0.17	0.323	0.424	0.215	0.105	0.209	0.058	-0.033	0.207	-0.192	0.129	0.682***	0.363	0.216	0.35	0.157	0.214	0.437*	0.183	0.377
IL-18	0.171	-0.292	0.095	-0.37	-0.391	-0.213	-0.139	-0.234	-0.165	-0.047	-0.17	-0.167	-0.049	0.075	0.017	0.162	-0.064	0.028	-0.216	0.031	-0.241	0.253	0.248	0.094	-0.292	-0.216	0.329	0.336	-0.165	0.317	0.313	0.201	-0.047	0.238	-0.06	0.385	0.008	0.328	-0.332	0.395	-0.094	0.297	0.323	-0.086
IL-23	-0.325	-0.067	0.22	-0.255	-0.146	-0.038	-0.091	-0.088	-0.098	0.015	-0.202	0.037	0.004	-0.138	-0.152	-0.156	-0.354	-0.117	-0.337	0.154	-0.035	0.253	0.258	0.074	-0.267	0.372	0.124	0.218	-0.294	0.12	0.055	0.102	0.038	0.131	0.659**	0.328	0.563**	0.525*	-0.074	0.301	0.224	0.568**	0.424	0.587**	0.129
IL-33	-0.195	-0.044	-0.104	-0.096	-0.075	-0.075	-0.133	-0.044	-0.008	-0.121	-0.05	-0.108	-0.007	0.158	-0.354	-0.232	-0.29	-0.21	-0.131	-0.086	0.144	0.136	-0.041	-0.069	-0.195	-0.031	-0.097	0.092	-0.274	-0.028	-0.075	-0.083	-0.185	-0.129	0.53*	0.219	0.727***	0.635**	-0.05	0.138	0.404	0.575**	0.51*	0.259	0.194	0.632**
Spearman's rho correlation coefficients for all variables included in this study are presented.
* : p-value < 0.05
** : p-value < 0.01
*** : p-value < 0.001
